# Supplementary material for: Subjective Household Economic Status and Obesity in Toddlers: A Cross-Sectional Study of Daycare Centers in Japan
Source: PubMed Central journal article supplement (PMC6290275; doi:10.2188/jea.je20170081), 2019-01-05
Supplement: je-29-033-s001.pdf [file je-29-033-s001.pdf]

**eTable 1.** Subjective household economic status and toddler obesity (n=1,848)

|                                      | Total, n | Obesity |      | Model 1 <sup>a</sup> |             | Model 2 <sup>b</sup> |             |
|--------------------------------------|----------|---------|------|----------------------|-------------|----------------------|-------------|
|                                      |          | n       | %    | OR                   | (95% CI)    | OR                   | (95% CI)    |
| Subjective household economic status |          |         |      |                      |             |                      |             |
| Most affluent                        | 133      | 10      | 7.5  | 1.00 (reference)     |             | 1.00 (reference)     |             |
| More affluent                        | 414      | 24      | 5.8  | 0.77                 | (0.36–1.65) | 0.84                 | (0.38–1.82) |
| Neither                              | 600      | 44      | 7.3  | 0.98                 | (0.48–2.01) | 1.10                 | (0.52–2.29) |
| Less affluent                        | 536      | 29      | 5.4  | 0.72                 | (0.34–1.51) | 0.83                 | (0.38–1.79) |
| Non-affluent                         | 165      | 19      | 11.5 | 1.61                 | (0.72–3.59) | 2.02                 | (0.86–4.73) |
| p-trend                              |          |         |      | 0.368                |             | 0.189                |             |

CI, confidence interval; OR, odds ratio.

<sup>a</sup> Model 1 was adjusted for gender and age (month; continuous).

<sup>b</sup> Model 2 was adjusted for gender, age (month; continuous), health literacy score (tertile categories:  $\leq 18$  points, 19–20 points,  $\geq 21$  points, missing), time affluence (more affluent, neither, less affluent, non-affluent, missing).
